# Supplementary material
Source: PubMed Central journal article supplement (PMC4372740)
Supplement: JB.02605-14_zjb999093570so1.pdf [file JB.02605-14_zjb999093570so1.pdf]

**Supplemental materials for**  
**The genetic basis for metabolism of methylated sulfur compounds in**  
***Methanosarcina***

He Fu and William W. Metcalf

This pdf file includes:

Tables S1 to S3

Figs. S1 to S6

Table S4 legend

References

TABLE S1. Plasmids used in this study

| Plasmid | Description and/or construction                                                                                                                                                                                   | Reference  |
|---------|-------------------------------------------------------------------------------------------------------------------------------------------------------------------------------------------------------------------|------------|
| pMP44   | Vector used to construct up- and down-region cassettes to delete genes in the <i>M. acetivorans</i> C2A chromosome using the markerless exchange method                                                           | (1)        |
| pFH002  | KpnI/SpeI-digested fusion PCR product of up-stream PCR product (with primers 5-upMA4164 and 3-upMA4164) and down-stream PCR product (with primers 5-dnMA4166 and 3-dnMA4166) cloned into KpnI/SpeI-digested pMP44 | This study |
| pFH003  | KpnI/SpeI-digested fusion PCR product of up-stream PCR product (with primers 5-upMA4164 and 3-upMA4164) and down-stream PCR product (with primers 5-dnMA4164 and 3-dnMA4164) cloned into KpnI/SpeI-digested pMP44 | This study |
| pFH004  | KpnI/SpeI-digested fusion PCR product of up-stream PCR product (with primers 5-upMA4165 and 3-upMA4165) and down-stream PCR product (with primers 5-dnMA4165 and 3-dnMA4165) cloned into KpnI/SpeI-digested pMP44 | This study |
| pFH005  | KpnI/SpeI-digested fusion PCR product of up-stream PCR product (with primers 5-upMA4166 and 3-upMA4166) and down-stream PCR product (with primers 5-dnMA4166 and 3-dnMA4166) cloned into KpnI/SpeI-digested pMP44 | This study |
| pFH006  | KpnI/SpeI-digested fusion PCR product of up-stream PCR product (with primers 5-upMA4167 and 3-upMA4167) and down-stream PCR product (with primers 5-dnMA4167 and 3-dnMA4167) cloned into KpnI/SpeI-digested pMP44 | This study |
| pJK027A | Vector used for construction of complementation of deletion mutants in <i>M. acetivorans</i> C2A                                                                                                                  | (2)        |
| pFH009  | NdeI/SbfI-digested MA4164 PCR product (with primers MA4164-F01 and MA4164-R01) cloned into NdeI/NsiI-digested pJK027A                                                                                             | This study |
| pFH010  | NdeI/SbfI-digested MA4165 PCR product (with primers MA4165-F01 and MA4165-R01) cloned into NdeI/NsiI-digested pJK027A                                                                                             | This study |
| pFH011  | NdeI/SbfI-digested MA4166 PCR product (with primers MA4166-F01 and MA4166-R01) cloned into NdeI/NsiI-digested pJK027A                                                                                             | This study |
| pFH012  | NdeI/SbfI-digested MA4164-66 PCR product (with primers MA4164-F03 and MA4166-R03) cloned into NdeI/NsiI-digested pJK027A                                                                                          | This study |
| pFH013A | NdeI/SbfI-digested fusion PCR product of PCR product 1 (with primers MA4167-F01a and MA4167-R01) and product 2 (with primers MA4167-F02 and MA4167-R02) cloned into NdeI/NsiI-digested pJK027A                    | This study |

TABLE S2. Primers used in this study

| Primer      | Sequence                                                     | Added site(s) |
|-------------|--------------------------------------------------------------|---------------|
| 5-up4164    | GGCGGCCGGTACCGAATCTTTGCTGGATTTCTTTTTTATCAAAGTGA              | KpnI          |
| 3-up4164    | TCAAAGCTTATCTGCAGACCAGTCAGCTGCCCTTTCTTTGAGGTCATCTCAGATAACCAT | None          |
| 5-dn4164    | ATGGATGACCTACCGGAAGAAGTCCAGGAATCCCGTCTGAAAGCGTGAGATGGAGTTGA  | None          |
| 3-dn4164    | GGCGGCCACTAGTTCTTCCATATTAACAGCCTGTTCTACACTGA                 | SpeI          |
| 5-up4165    | GGCGGCCGGTACCTTAACATGTTATTTTTTCAGAGCTCTCTGT                  | KpnI          |
| 3-up4165    | TCAAAGCTTATCTGCAGACCAGTCAGCTGCCCTTTCTTTGAGGTCATCTCAGATAACCAT | None          |
| 5-dn4165    | ATGGTATCTGAGATGACCTCAAAGAAAGGGCAGCTGACTGGTCTGCAGATAAGCTTTGA  | None          |
| 3-dn4165    | GGCGGCCACTAGTAGGACTTTCTTTCTGGACTTGAGCACTTTAT                 | SpeI          |
| 5-up4166    | GGCGGCCGGTACCTTGACAATATTGTAATGCCTTTTGGAAATGT                 | KpnI          |
| 3-up4166    | TTATCTCTGTGACCCGACAGGTAATCCCAATAACAAAACCCAGCGGTATTTTCAT      | None          |
| 5-dn4166    | ATGAAATACCGCTGGGTGGTTTTTGTATTGGGGAAGTACCTGTGCGGGTCACAGAGATAA | None          |
| 3-dn4166    | GGCGGCCACTAGTAGCAGAAGAGAATAGGGAAACATTAGTTGA                  | SpeI          |
| 5-up4167    | GGCGGCCGGTACCATAAGAAGTAAAGATAAGGAAAAGATAGAA                  | KpnI          |
| 3-up4167    | TCAGAAATTTACTGGCTTTTGTGATATTATTTTTATCAGGCAAGATGGGTCCAATCTCAA | None          |
| 5-dn4167    | TTGAGATTGGACCCATCTTGCCTGATAAAATATAATATCACAAAAGCCAGTAAATTCTGA | None          |
| 3-dn4167    | GGCGGCCACTAGTAATACACTTAAAATAGTGTGGTACTACTTC                  | SpeI          |
| MA4164-F01  | GGCCATATGGATGACCTACCGGAAGAAG                                 | NdeI          |
| MA4164-R01  | GGCCTGCAGGCAAAAACACCTGTAAAGTTCAACTCC                         | SbfI          |
| MA4165-F01  | GGCCATATGGTATCTGAGATGACCTCAAAGAAAG                           | NdeI          |
| MA4165-R01  | GGCCTGCAGGCAAAGCTTATCTGATCAAAGCTTATCTGC                      | SbfI          |
| MA4166-F01  | GGCCATATGAAATACCGCTGGGTGGTTTTTG                              | NdeI          |
| MA4166-R01  | GGCCTGCAGGCCTGATTTTTGCTCCAAACCTTTCC                          | SbfI          |
| MA4167-F01a | GGCCATATGAGATTGGACCCATCTTGCCTG                               | NdeI          |
| MA4167-R01  | TTCCCGATCCTTTTTCTCATGTGATACGGGATTTCACTAAGGTCCG               | None          |
| MA4167-F02  | CTTAGTCAAATCCCGTATCACATGAGAAAAGGATCGGGAACCTG                 | None          |
| MA4164-F03  | GGCGGCCCATATGGATGACCTACCGGAAGAAGTCCAG                        | AscI, NdeI    |
| MA4166-R03  | GGCGGCCCTGCAGGCCGGAAGACTAAGGTTTTTCAGATACTCTGC                | SbfI          |
| 16sFor      | ATTCTGGTTGATCCTGCCAGAGGTTAC                                  | None          |
| T7_16sRev   | GCCGGGAATTTAATACGACTCACTATAGGGGGTCAGGTTCGAACACGGCAGC         | None          |
| 23sFor      | CAAACGTCTGGCGGTAAAAT                                         | None          |
| T7_23sRev   | GCCGGGAATTTAATACGACTCACTATAGGGCCTATCGGGGTCTCTTCTC            | None          |

Table S3. Generation time for *Methanosarcina* strains on various substrates

| Strain                | Generation time (h) on various substrates <sup>a</sup> |            |            |            |             |            |            |
|-----------------------|--------------------------------------------------------|------------|------------|------------|-------------|------------|------------|
|                       | MeOH                                                   | TMA        | DMA        | MMA        | Acetate     | DMS        | MeSH       |
| <b>WT C2A</b>         | 9.6 ± 0.6                                              | 16 ± 3.5   | 18.2 ± 3.3 | 25.6 ± 3.4 | 46.3 ± 9.6  | 20.7 ± 3.6 | 44.8 ± 5.7 |
| <b>WWM82</b>          | 10.1 ± 1.0                                             | 15.5 ± 2.5 | 26.4 ± 3.1 | 29.1 ± 6.6 | 49.5 ± 13.8 | 24.1 ± 4.7 | 52.8 ± 1.2 |
| <b><i>ΔmtpCAP</i></b> | 9.0 ± 0.4                                              | 18.4 ± 0.3 | 23.7 ± 3.7 | 29.1 ± 7.5 | 47.2 ± 13.1 | 25.7 ± 5.0 | 45.3 ± 7.0 |
| <b><i>ΔmtpC</i></b>   | 10.2 ± 0.6                                             | 13.1 ± 1.4 | 20.9 ± 1.2 | 39.9 ± 3.5 | 48.6 ± 9.2  | 23.4 ± 2.4 | 30.7 ± 0.3 |
| <b><i>ΔmtpA</i></b>   | 9.9 ± 0.2                                              | 13.4 ± 0.8 | 22.7 ± 2.6 | 28.3 ± 4.1 | 48.7 ± 8.2  | 21.5 ± 2.1 | 47.8       |
| <b><i>ΔmtpP</i></b>   | 9.3 ± 0.5                                              | 14.3 ± 1.2 | 21.4 ± 2.6 | 28.3 ± 3.0 | 56.4 ± 1.4  | 23.8 ± 1.3 | 46.1 ± 1.5 |
| <b><i>ΔmsrH</i></b>   | 9.3 ± 0.6                                              | 14.8 ± 2.7 | 22.4 ± 1.9 | 32.0 ± 2.6 | 61.0 ± 7.2  | 25.6 ± 5.2 | 35.4       |

<sup>a</sup> Growth was measured as indicated in Materials and Methods. Values represent the average and standard deviations of at least three replicates, with the exception of *ΔmtpA* and *ΔmsrH* on MeSH, which were measured once. Abbreviations: methanol (MeOH), trimethylamine (TMA), dimethylamine (DMA), monomethylamine (MMA), dimethylsulfide (DMS), methanethiol (MeSH). Strains used are described in Table 1.

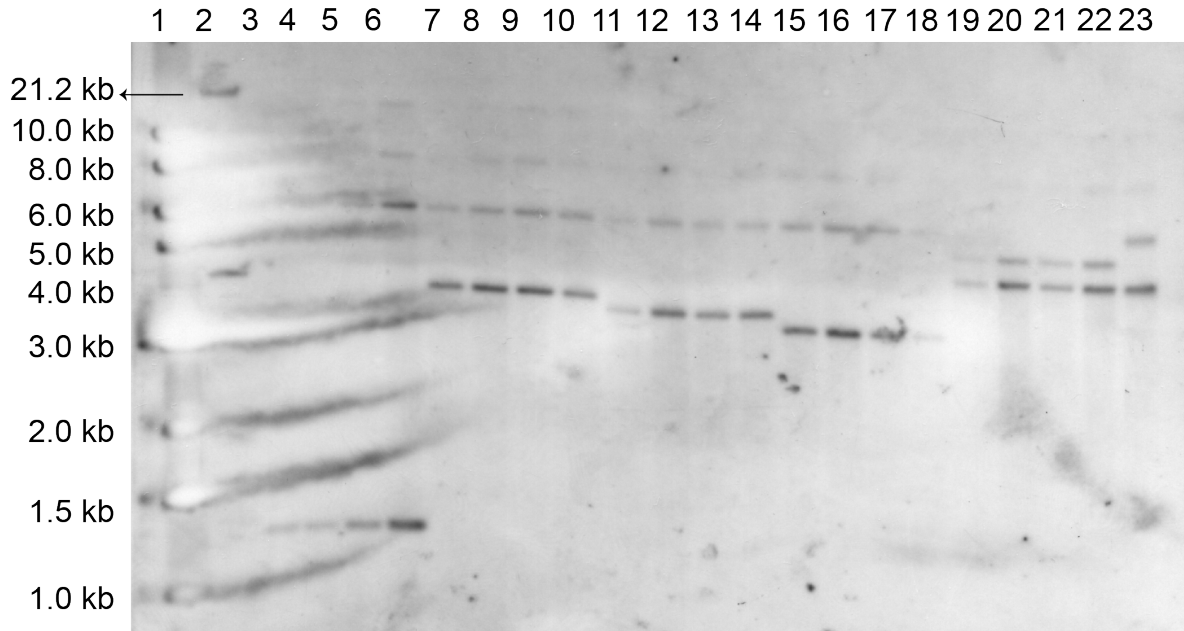

**Fig. S1. Verification of the genotypes of *mtpCAP-msrH* mutants via Southern hybridization.** Genomic DNA from several independent isolates was prepared, restricted with BstBI, separated by agarose gel electrophoresis, blotted onto membranes and probed with DIG-labeled pFH002 as described in the main text. Lane 1, 1-kb DNA ladder (NEB); Lane 2, DIG-labeled EcoRI/HindIII lambda DNA (Roche); Lane 3-6:  $\Delta mtpCAP$  (predicted bands size: 6.4 kb, 1.3 kb); Lane 7-10:  $\Delta mtpC$  (predicted bands size: 6.4kb, 4.0 kb); Lane 11-14:  $\Delta mtpA$  (predicted bands size: 6.4 kb, 3.8 kb); Lane 15-18:  $\Delta mtpP$  (predicted bands size: 6.4 kb, 3.5 kb); Lane 19-22:  $\Delta msrH$  (predicted bands size: 5.6 kb, 4.8 kb); Lane 23: Wild-type C2A (predicted bands size: 6.4 kb, 4.8 kb).

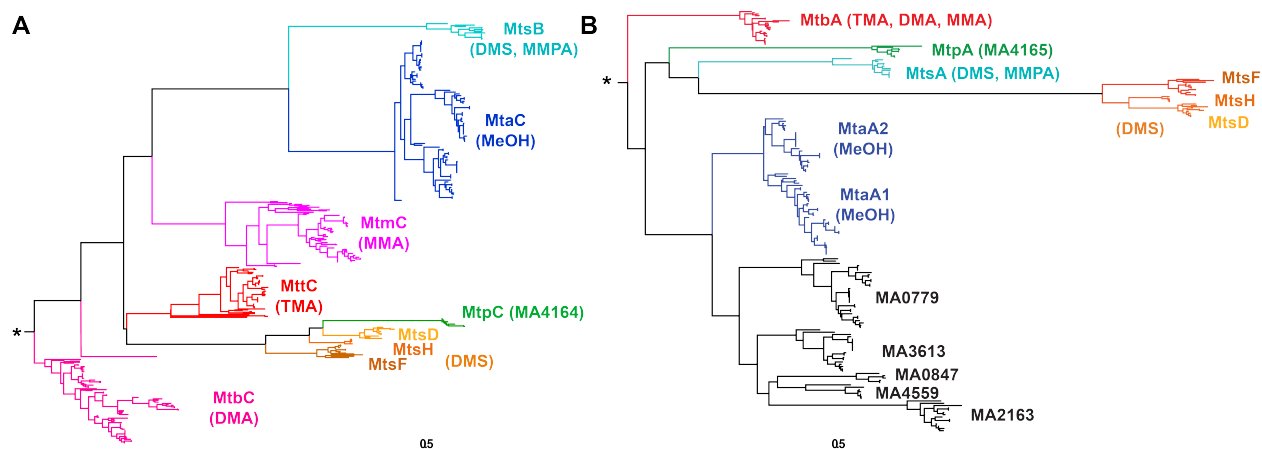

**Fig. S2. Phylogeny of *Methanosarcina* MT1 corrinoide subunits and MT2 proteins.** Homologous proteins from thirty sequenced *Methanosarcina* genomes were retrieved and analyzed using the ITEP bioinformatics tools (3). Clusters of orthologous genes were generated in ITEP using MCL clustering with stringent parameters. Protein alignments were then generated with CLUSTALW prior to construction of phylogenetic trees using FastTree (4) using WAG model of evolution. Substrate-specific clades were identified based on the inclusion of biochemically or genetically characterized proteins. *Panel A*: Phylogeny of MT1 corrinoide subunits. Methionine synthase (MetH, GenBank accession number NP418443) from *E. coli* was used as an out-group to root the tree (shown in asterisk). *Panel B*: Phylogeny of MT2 proteins. UroD from *Desulfobacterium autotrophicum* (GenBank accession number ACN17787) was used as an out-group to root the tree (shown in asterisk). Scale bar refers to 0.5 substitutions per site. Abbreviations: TMA, Trimethylamine; DMA, Dimethylamine; MMA, Monomethylamine; MeOH, Methanol; DMS, Dimethylsulfide; MMPA, Methylmercaptopropionate. Genomes analyzed include: *M. acetivorans* C2A, *M. barkeri* Fusaro, *M. mazei* Go1, *M. sp.* MTP4, *M. thermophila* TM1, *M. thermophila* CHT155, *M. thermophila* MSTA1, *M. vacuolata* Z761, *M. sp.* Kolskee, *M. barkeri* Weismoor, *M. barkeri* MS, *M. barkeri* 227, *M. barkeri* 3, *M. siciliae* C2J, *M. siciliae* HI350, *M. siciliae* T4M, *M. sp.* WH1, *M. sp.* WWM586, *M. lacustris* Z7289, *M. horonobensis* HB1, *M. mazei* SarPi, *M. mazei* LYC, *M. mazei* S6, *M. mazei* TMA, *M. mazei* WWM610, *M. mazei* C16, *M. baltica* GS1, *M. sp.* Naples 100, *M. lacustris* ZS and *M. calensis* Cali. Full data can be found in NCBI BioProjects 230935-230962, and GenBank accession numbers NC\_003901.1, NC\_003552.1 and NC\_007355.1).

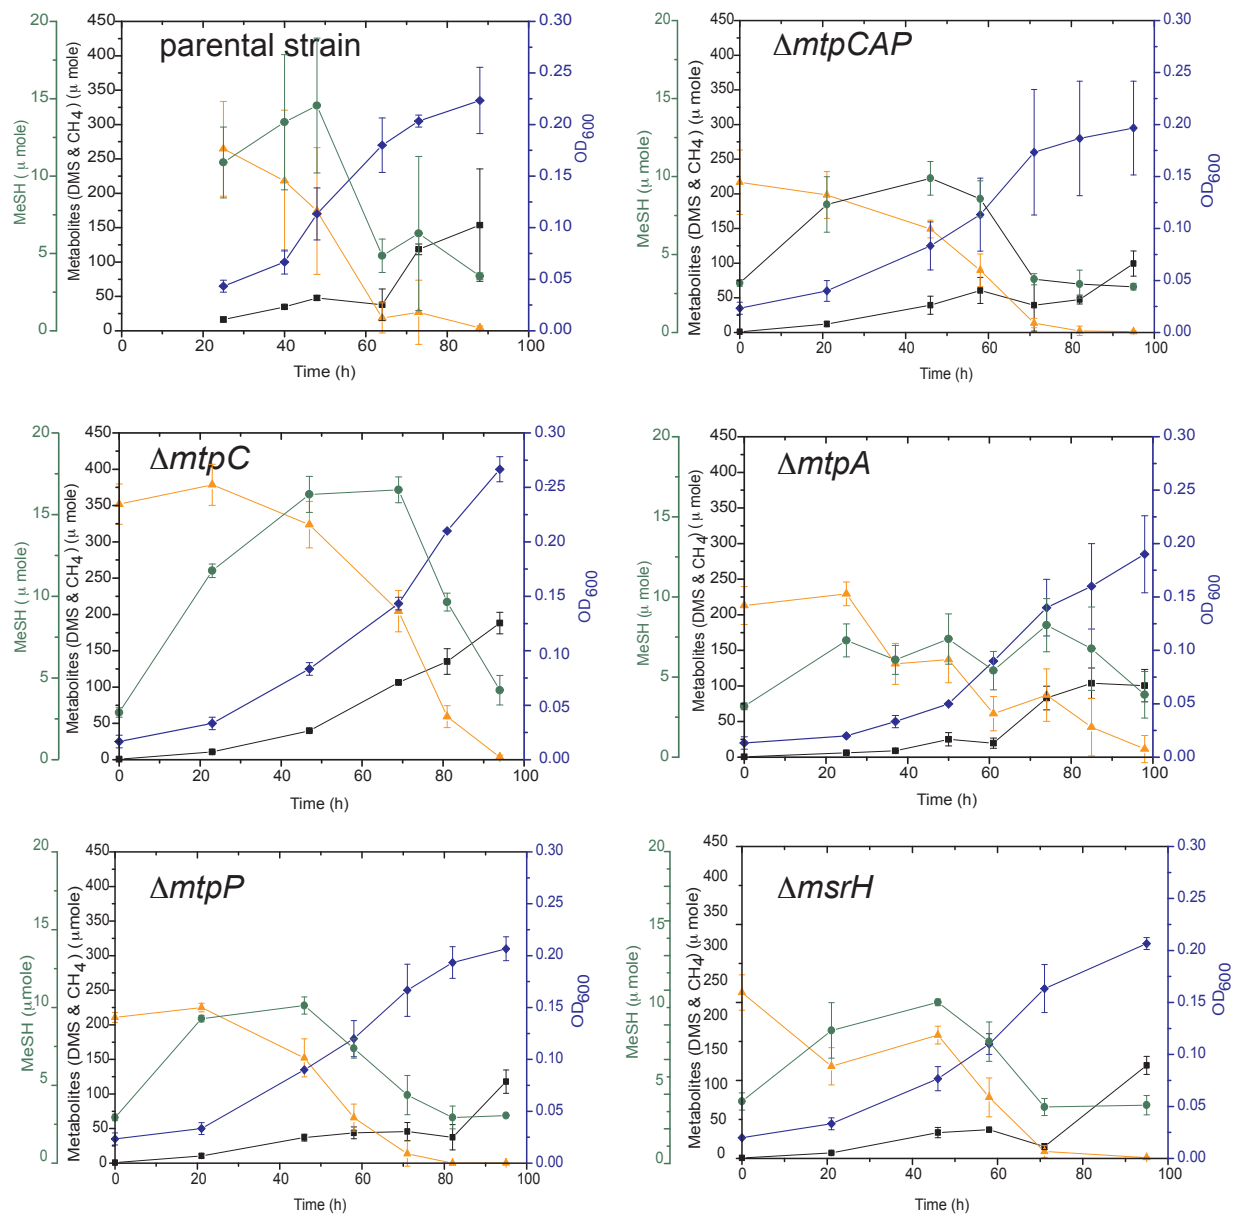

**Fig. S3. Growth and metabolite production of *M. acetivorans* strains in DMS medium.** The indicated mutants were grown in HS-MA medium with 20 mM DMS. Metabolites were measured via gas chromatography as described. Strains used were: WWM82 (parental strain), WWM829 ( $\Delta mtpCAP$ ), WWM830 ( $\Delta mtpC$ ), WWM831 ( $\Delta mtpA$ ), WWM832 ( $\Delta mtpP$ ), WWM833 ( $\Delta msrH$ ). Error bars represent standard deviation of triplicate cultures. Symbols: ■, Methane; ●, MeSH; ▲, DMS; ◆, OD<sub>600</sub>. Error bars represent standard deviation of triplicate cultures.

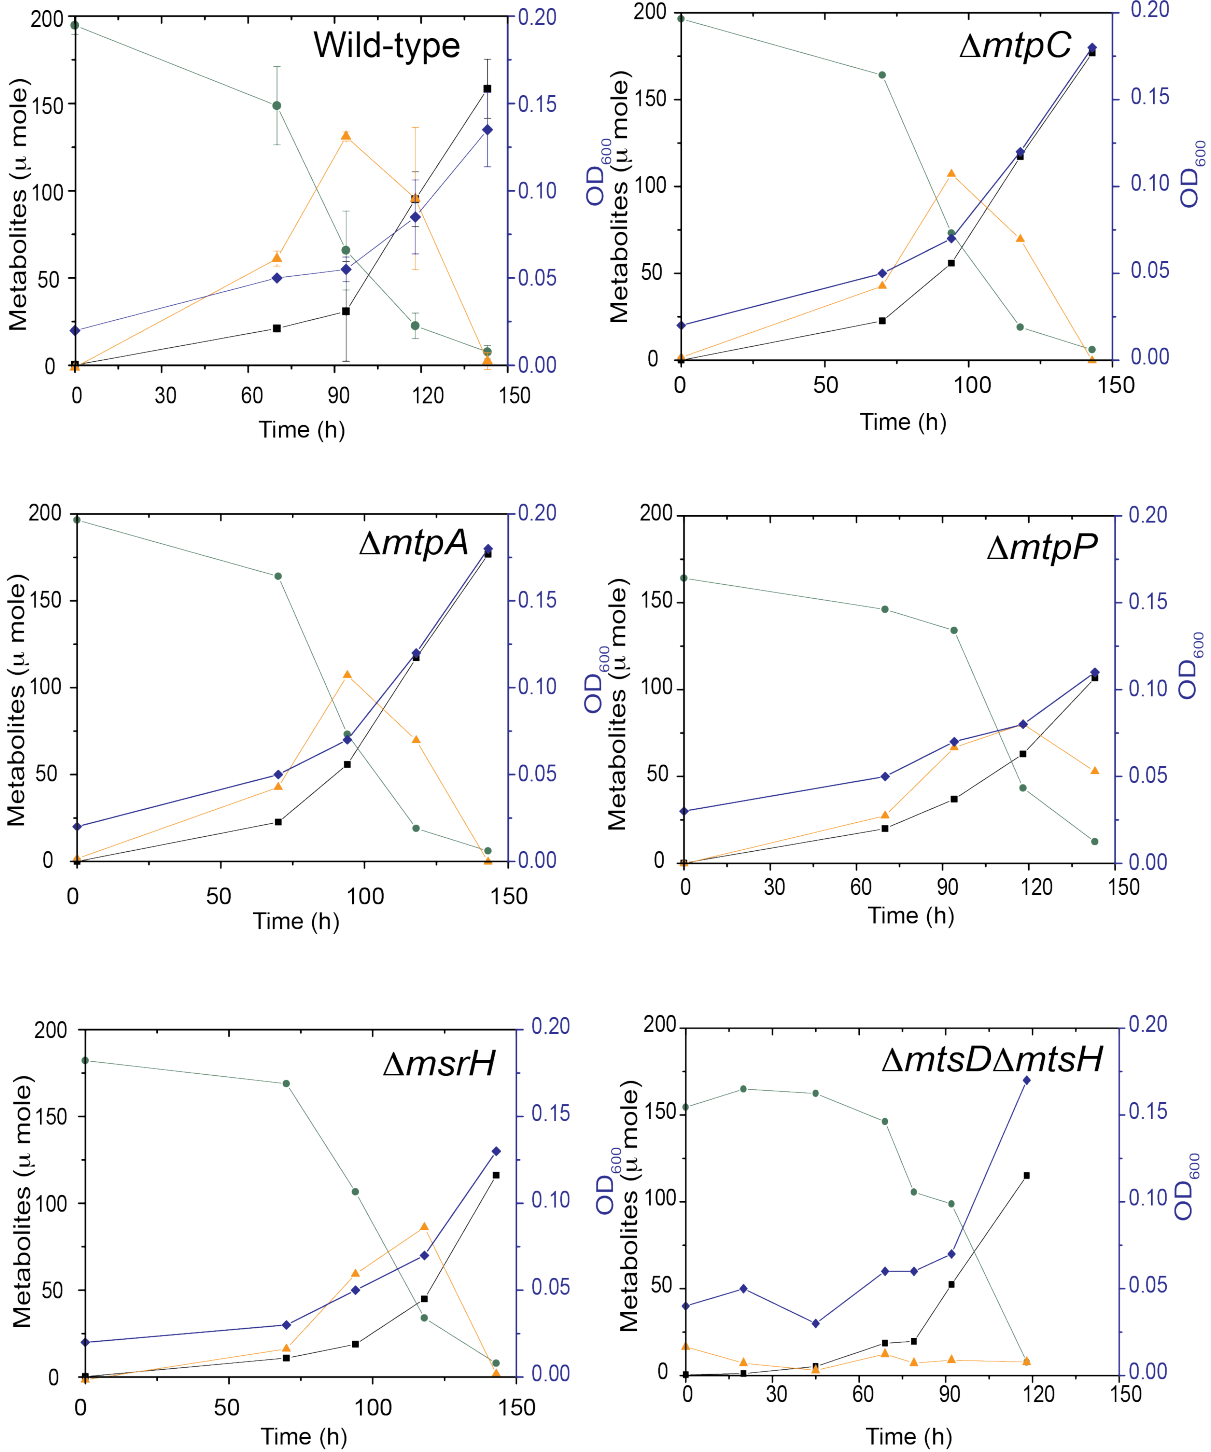

**Fig. S4. Growth and metabolite production of *M. acetivorans* strains in MeSH medium.** The indicated mutants were grown in HS-MA medium with 20 mM MeSH. Metabolites were measured via gas chromatography as described. Strains used were: WWM82 (parental strain), WWM830 ( $\Delta mtpC$ ), WWM831 ( $\Delta mtpA$ ), WWM832 ( $\Delta mtpP$ ), WWM833 ( $\Delta msrH$ ) and WWM814 ( $\Delta mtsD\Delta mtsH$ ). Symbols: ■, Methane; ●, MeSH; ▲, DMS; ◆, OD<sub>600</sub>. Error bars represent standard deviation of triplicate cultures.



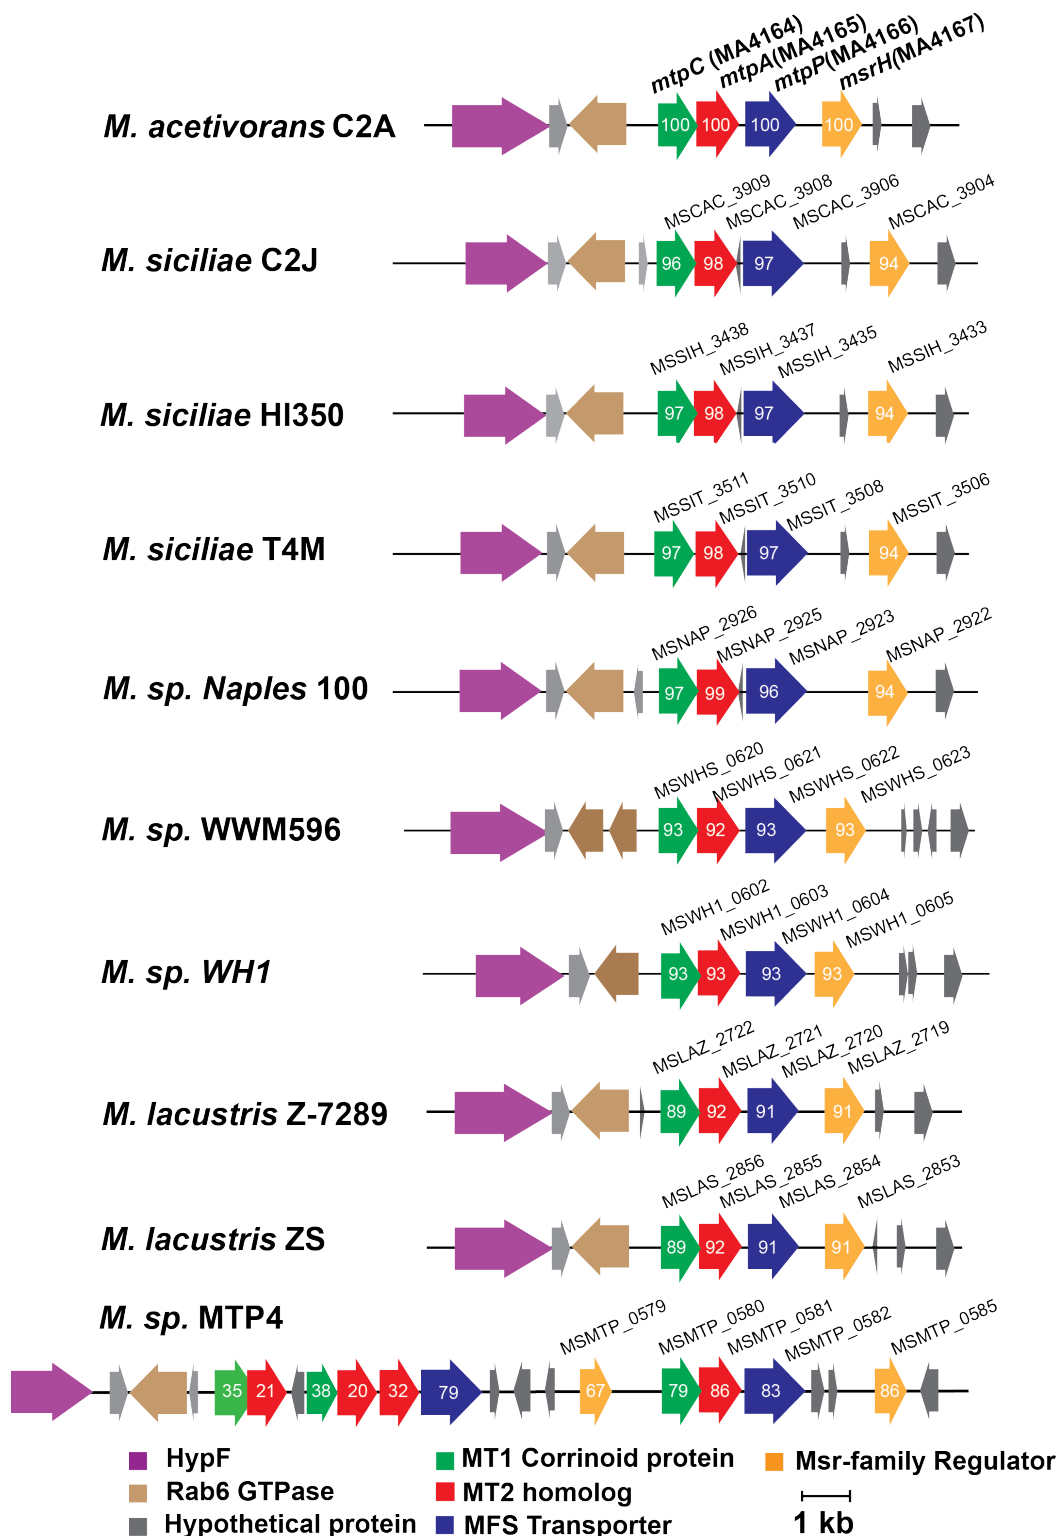

**Fig. S5. The genomic neighborhoods of the *mtpCAP-msrH* ten sequenced *Methanosarcina* genomes.** The *M. acetivorans* locus is shown at the top with the homologous loci on subsequent lines. The locus tags and percent identity to the corresponding *M. acetivorans* genes are shown for each. The general protein families were color coded as indicated based on annotations found in the published *M. acetivorans* genome sequence (5).

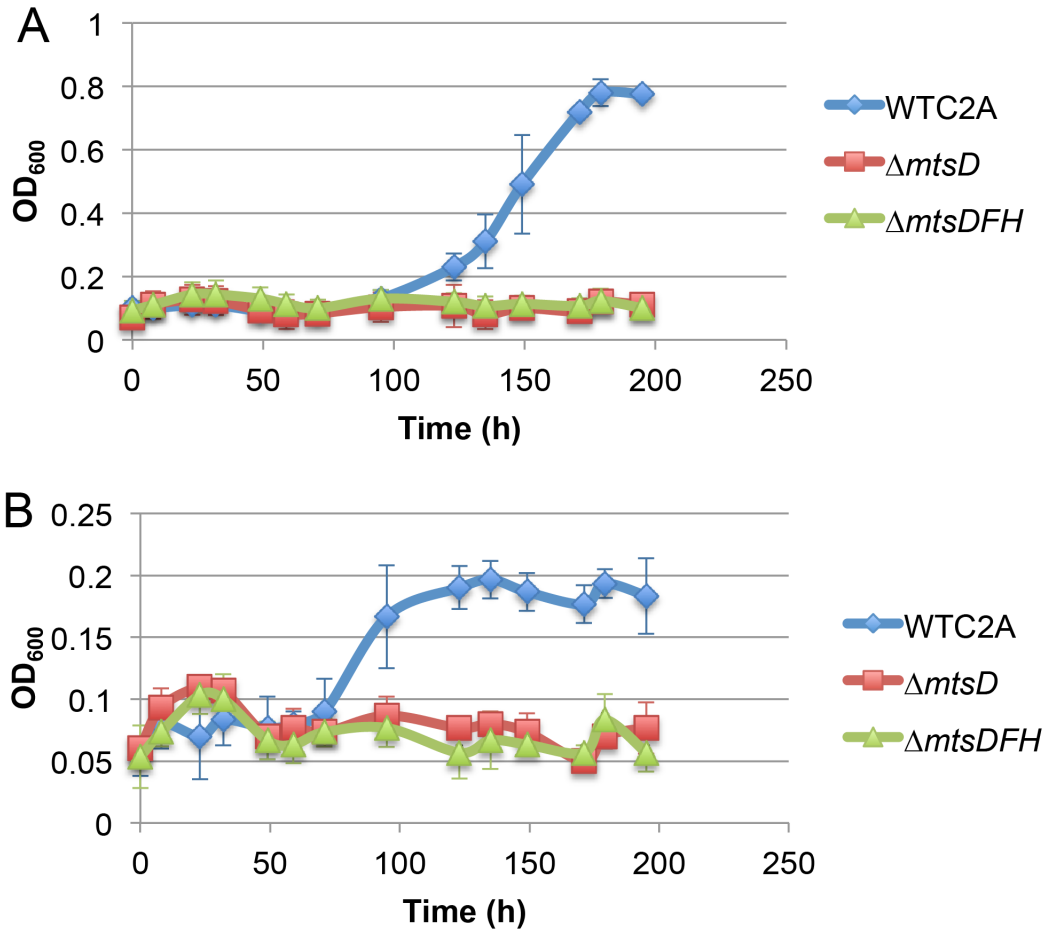

**Fig. S6. Growth of *M. acetivorans* strains in DMS medium.** The indicated mutants were grown in HS medium with 20 mM DMS (A) and 5 mM DMS (B). Values are the average of triplicates cultures, and error bars are the standard deviations.

## Table S4 Legend

The whole dataset of RNA-seq analysis of *M. acetivorans* grown on MMPA, DMS, MeSH and MeOH. For pair-wise comparison, our criteria for differentially expressed genes: fold expression change > 4, P-value < .01.

## References

1. **Pritchett MA, Zhang JK, Metcalf WW.** 2004. Development of a markerless genetic exchange method for *Methanosarcina acetivorans* C2A and its use in construction of new genetic tools for methanogenic archaea. *Appl. Environ. Microbiol.* **70**:1425-1433.
2. **Guss AM, Rother M, Zhang JK, Kulkarni G, Metcalf WW.** 2008. New methods for tightly regulated gene expression and highly efficient chromosomal integration of cloned genes for *Methanosarcina* species. *Archaea* **2**:193-203.
3. **Benedict MN, Henriksen JR, Metcalf WW, Whitaker RJ, Price ND.** 2014. ITEP: an integrated toolkit for exploration of microbial pan-genomes. *BMC Genomics* **15**:8.
4. **Price MN, Dehal PS, Arkin AP.** 2010. FastTree 2--approximately maximum-likelihood trees for large alignments. *Plos One* **5**:e9490.
5. **Galagan JE, Nusbaum C, Roy A, Endrizzi MG, Macdonald P, FitzHugh W, Calvo S, Engels R, Smirnov S, Atnoor D, Brown A, Allen N, Naylor J, Stange-Thomann N, DeArellano K, Johnson R, Linton L, McEwan P, McKernan K, Talamas J, Tirrell A, Ye WJ, Zimmer A, Barber RD, Cann I, Graham DE, Grahame DA, Guss AM, Hedderich R, Ingram-Smith C, Kuettner HC, Krzycki JA, Leigh JA, Li WX, Liu JF, Mukhopadhyay B, Reeve JN, Smith K, Springer TA, Umayam LA, White O, White RH, de Macario EC, Ferry JG, Jarrell KF, Jing H, Macario AJL, Paulsen I, Pritchett M, Sowers KR, et al.** 2002. The genome of *M. acetivorans* reveals extensive metabolic and physiological diversity. *Genome Res.* **12**:532-542.
